# Supplementary material for: β2-Syntrophin Is a Cdk5 Substrate That Restrains the Motility of Insulin Secretory Granules
Source: PubMed Central journal article supplement (PMC2944849; doi:10.1371/journal.pone.0012929), 2010-09-23
Supplement: pone.0012929.s010.pdf [file pone.0012929.s010.pdf]

| A) Beta2-syntrophin overexpression       |                       |                                            |                            |
|------------------------------------------|-----------------------|--------------------------------------------|----------------------------|
| INS-1 cell clone                         | IC [ng/ml]            | BIS [ng/ml]                                | SI                         |
| INS-1                                    | 1891 ± 16             | 3.95 ± 0.23 (100%)                         | 42 ± 2.58 (100%)           |
| G8                                       | 3083 ± 111 (p=0.018)  | 2.63 ± 0.04 (68%, p=0.001)                 | 81 ± 2.45 (194%, p=0.001)  |
| G6                                       | 2664 ± 195 (p=0.078)  | 3.31 ± 0.06 (83%, p=0.065)                 | 60 ± 1.47 (145%, p=0.087)  |
| G1                                       | 2359 ± 67 (p=0.038)   | 3.89 ± 0.12 (99%, p=0.453)                 | 48 ± 3.31 (115%, p=0.017)  |
| EGFP                                     | 1702 ± 137 (p=0.199)  | 4.8 ± 0.61 (129%, p=0.167)                 | 39 ± 2.57 (95%, p=0.018)   |
| B) Beta2-syntrophin knockdown and rescue |                       |                                            |                            |
| transfected INS-1 cells                  | IC [ng/ml]            | BIS [ng/ml]                                | SI                         |
| scr shRNA                                | 1575 ± 99             | 5.54 ± 0.40 (100%)                         | 23 ± 1.82 (100%)           |
| β2-syn shRNA                             | 1222 ± 127 (p=0.039)  | 8.5 ± 0.26 (154%, p=0.012)                 | 13 ± 0.91 (56%, p=0.006)   |
| GFP-β2-syn / scr shRNA                   | 3291 ± 515 (p=0.018)  | 3.91 ± 0.24 (p=0.001)                      | 40 ± 8.65 (p=0.009)        |
| GFP-β2-syn / β2-syn shRNA                | 1906 ± 243 (p=0.014)  | 4.84 ± 0.44 (p=0.045)                      | 28 ± 5.18 (p=0.002)        |
| C) Beta2-syntrophin phosphomutants       |                       |                                            |                            |
| transfected INS-1 cells                  | IC [ng/ml]            | BIS [ng/ml]                                | SI                         |
| INS-1                                    | 1038 ± 10.7           | 2.02 ± 0.08 (100%)                         | 55 ± 3.33 (100%)           |
| EGFP                                     | 1057 ± 18.1 (p=0.856) | 1.9 ± 0.35 (94%, p=0.503)                  | 54 ± 2.61 (98%, p=0.634)   |
| GFP-β2-syn                               | 1420 ± 4.9 (p=0.002)  | 1.2 ± 0.10 (61%, p=1.5*10 <sup>-7</sup> )  | 81 ± 12.94 (148%, p=0.005) |
| GFP-β2-syn S75A                          | 1546 ± 12.4 (p=0.001) | 1.8 ± 0.18 (89%, p=0.126)                  | 63 ± 8.43 (115%, p=0.093)  |
| GFP-β2-syn S90A                          | 848 ± 14.5 (p=0.085)  | 2.4 ± 0.24 (120%, p=0.011)                 | 43 ± 4.01 (78%, p=0.0005)  |
| GFP-β2-syn S75D                          | 736 ± 17.1 (p=0.030)  | 2.9 ± 0.58 (143%, p=0.020)                 | 38 ± 4.21 (69%, p=0.0002)  |
| GFP-β2-syn S90D                          | 1716 ± 21.2 (p=0.003) | 1.8 ± 0.09 (92%, p=0.105)                  | 60 ± 9.63 (111%, p=0.249)  |
| GFP-β2-syn S75A/S90D                     | 1847 ± 19.0 (p=0.001) | 1.4 ± 0.09 (71%, p=8.08*10 <sup>-7</sup> ) | 73 ± 13.27 (134%, p=0.035) |
| GFP-β2-syn S75D/S90A                     | 580 ± 24.2 (p=0.024)  | 2.5 ± 0.2 (126%, p=0.02)                   | 41 ± 1.39 (74%, p=0.022)   |
| GFP-β2-syn S75A/S90A                     | 1119 ± 9.7 (p=0.303)  | 2.0 ± 0.66 (100%, p=0.994)                 | 55 ± 1.60 (102%, p=0.651)  |
| GFP-β2-syn S75D/S90D                     | 1313 ± 22.2 (p=0.084) | 1.9 ± 0.09 (92%, p=0.567)                  | 50 ± 4.62 (92%, p=0.138)   |
