# Supplementary material for: β2-Syntrophin Is a Cdk5 Substrate That Restrains the Motility of Insulin Secretory Granules
Source: PubMed Central journal article supplement (PMC2944849; doi:10.1371/journal.pone.0012929), 2010-09-23
Supplement: pone.0012929.s011.pdf [file pone.0012929.s011.pdf]

| <b>A) Granule density</b>                          |                         |                                                    |           |           |               |
|----------------------------------------------------|-------------------------|----------------------------------------------------|-----------|-----------|---------------|
| Stimulus                                           | CgB-mRFP INS-1 cells    | SG/100 $\mu\text{m}^2$                             | p-value   | p-value   | no. of movies |
| Resting                                            | GFP                     | 24 $\pm$ 3.10                                      |           |           | m=15          |
| HGHK                                               | GFP                     | 13 $\pm$ 2.62                                      | 2.909E-10 |           | m=15          |
| Resting                                            | GFP- $\beta$ 2-syn      | 10 $\pm$ 4.39                                      |           | 2.004E-11 | m=17          |
| HGHK                                               | GFP- $\beta$ 2-syn      | 6 $\pm$ 1.53                                       | 1.767E-03 | 4.666E-09 | m=12          |
| Resting                                            | GFP                     | 17.5 $\pm$ 4.76                                    |           | 1.370E-16 | m=64          |
| Resting                                            | GFP- $\beta$ 2-syn      | 10.3 $\pm$ 2.97                                    | 1.370E-16 |           | m=49          |
| Resting                                            | GFP- $\beta$ 2-syn S75D | 15.2 $\pm$ 4.76                                    | 0.01423   | 1.650E-10 | m=64          |
| Resting                                            | GFP- $\beta$ 2-syn S90D | 12.1 $\pm$ 3.45                                    | 9.314E-08 | 0.0057    | m=32          |
| <b>B) Granule mobility - speed distribution</b>    |                         |                                                    |           |           |               |
| Stimulus                                           | CgB-mRFP INS-1 cells    | Speed Distrib.<br>[ $\mu\text{m}/\text{s}$ ]       | p-value   | p-value   | no. of movies |
| Resting                                            | GFP                     | 0.455 $\pm$ 0.0697                                 |           |           | m=15          |
| HGHK                                               | GFP                     | 0.450 $\pm$ 0.0237                                 | 0.8348    |           | m=5           |
| Resting                                            | GFP- $\beta$ 2-syn      | 0.338 $\pm$ 0.0254                                 |           | 1.52E-05  | m=17          |
| HGHK                                               | GFP- $\beta$ 2-syn      | 0.403 $\pm$ 0.0152                                 | 1.85E-07  | 0.0121    | m=8           |
| Resting                                            | GFP                     | 0.516 $\pm$ 0.1434                                 |           | 2.590E-09 | m=64          |
| Resting                                            | GFP- $\beta$ 2-syn      | 0.376 $\pm$ 0.0504                                 | 2.590E-09 |           | m=49          |
| Resting                                            | GFP- $\beta$ 2-syn S75D | 0.444 $\pm$ 0.1165                                 | 0.00081   | 1.700E-04 | m=64          |
| Resting                                            | GFP- $\beta$ 2-syn S90D | 0.380 $\pm$ 0.0465                                 | 1.180E-06 | 0.6736    | m=32          |
| <b>C) Granule mobility - Diffusion Coefficient</b> |                         |                                                    |           |           |               |
| Stimulus                                           | CgB-mRFP INS-1 cells    | Diffusion Coeff.<br>D [ $\mu\text{m}^2/\text{s}$ ] | p-value   | p-value   | no. of movies |
| Resting                                            | GFP                     | 0.023 $\pm$ 0.004                                  |           |           | m=15          |
| HGHK                                               | GFP                     | 0.043 $\pm$ 0.009                                  | 0.0097    |           | m=5           |
| Resting                                            | GFP- $\beta$ 2-syn      | 0.015 $\pm$ 0.003                                  |           | 9.49E-05  | m=17          |
| HGHK                                               | GFP- $\beta$ 2-syn      | 0.047 $\pm$ 0.008                                  | 0.0079    | 0.7540    | m=8           |
| Resting                                            | GFP                     | 0.0189 $\pm$ 0.005                                 |           | 2.23E-13  | m=64          |
| Resting                                            | GFP- $\beta$ 2-syn      | 0.0115 $\pm$ 0.003                                 | 2.23E-13  |           | m=49          |
| Resting                                            | GFP- $\beta$ 2-syn S75D | 0.0145 $\pm$ 0.006                                 | 3.260E-05 | 0.0019    | m=64          |
| Resting                                            | GFP- $\beta$ 2-syn S90D | 0.0128 $\pm$ 0.003                                 | 5.120E-08 | 0.426     | m=32          |
