# Supplementary material for: β2-Syntrophin Is a Cdk5 Substrate That Restrains the Motility of Insulin Secretory Granules
Source: PubMed Central journal article supplement (PMC2944849; doi:10.1371/journal.pone.0012929), 2010-09-23
Supplement: pone.0012929.s012.pdf [file pone.0012929.s012.pdf]

| sample                     | total no. of Granules | <u>major/minor diameter <math>\geq 1.9</math></u> |                 | p-value | p-value | no. of images |
|----------------------------|-----------------------|---------------------------------------------------|-----------------|---------|---------|---------------|
|                            |                       | [granule no.]                                     | [%]             |         |         |               |
| R INS-1                    | 351 $\pm$ 24          | 4                                                 | 1.63 $\pm$ 2.49 | 0.9396  |         | 9             |
| R GFP- $\beta$ 2-syn INS-1 | 240 $\pm$ 26          | 2                                                 | 1.51 $\pm$ 3.39 |         |         | 7             |
| M INS-1                    | 230 $\pm$ 10          | 5                                                 | 1.81 $\pm$ 5.09 | 0.0238  | 0.9225  | 16            |
| M GFP- $\beta$ 2-syn INS-1 | 323 $\pm$ 19          | 23                                                | 6.04 $\pm$ 3.86 |         |         | 12            |
