# Supplementary material for: β2-Syntrophin Is a Cdk5 Substrate That Restrains the Motility of Insulin Secretory Granules
Source: PubMed Central journal article supplement (PMC2944849; doi:10.1371/journal.pone.0012929), 2010-09-23
Supplement: pone.0012929.s013.pdf [file pone.0012929.s013.pdf]

| <i>in vitro</i> transcribed-translated products | <sup>35</sup> S-labeled His-β2-syn [%] |          |             |          |
|-------------------------------------------------|----------------------------------------|----------|-------------|----------|
|                                                 | SA                                     | p-value  | SD          | p-value  |
| His-β2-syn                                      | 100                                    |          | 100         |          |
| His-β2-syn 75                                   | 122 ± 2.00                             | p=0.0289 | 80 ± 5.15   | p=0.0034 |
| His-β2-syn 90                                   | 85 ± 2.50                              | p=0.0509 | 114 ± 6.98  | p=0.0525 |
| His-β2-syn S75A/S90D                            | 120 ± 9.90                             | p=0.0519 |             |          |
| His-β2-syn S75D/S90A                            |                                        |          | 82 ± 8.18   | p=0.0434 |
| His-β2-syn S75A/S90A                            | 87 ± 12.63                             | p=0.4919 |             |          |
| His-β2-syn S75D/S90D                            |                                        |          | 92 ± 8.4942 | p=0.5206 |
| His-β2-syn 213                                  | 90 ± 14.47                             | p=0.1587 | 92 ± 7.07   | p=0.1254 |
| His-β2-syn 375                                  | 89 ± 12.75                             | p=0.1734 | 95 ± 6.80   | p=0.1366 |
