# Supplementary material for: β2-Syntrophin Is a Cdk5 Substrate That Restrains the Motility of Insulin Secretory Granules
Source: PubMed Central journal article supplement (PMC2944849; doi:10.1371/journal.pone.0012929), 2010-09-23
Supplement: pone.0012929.s014.pdf [file pone.0012929.s014.pdf]

| <b>A) Oligonucleotides for Site-Chain-Mutagenesis</b> |                                                                   |
|-------------------------------------------------------|-------------------------------------------------------------------|
| <b>S75A</b>                                           | 5'-GCCTGGGGCCGCTGCTCCTCCCGCGCCGCC-3'                              |
| <b>S90A</b>                                           | 5'-GGAAGCGAGCGCCGCTCCTCCCGTGCGCCGAGTGC-3'                         |
| <b>S213A</b>                                          | 5'-CTGGATGTCGGGGCCCCCTCCCTTGG-3'                                  |
| <b>S373A</b>                                          | 5'-CTGGATGTCGGGGCCCCCTCCCTTGG-3'                                  |
| <b>S75D</b>                                           | 5'-GGCCTGGGGCCGCCGGATCCTCCCGCGCCGCCCC-3'                          |
| <b>S90D</b>                                           | 5'-GGGGGAAGCGAGCGCGGATCCGCCCGTGCGCCGAG-3'                         |
| <b>S213D</b>                                          | 5'-CAGGTTCTGGATGTCGGGGATCCCTCCCTTGGATCTGACC-3'                    |
| <b>S373D</b>                                          | 5'-CAGGTTCTGGATGTCGGGGATCCCTCCCTTGGATCTGACC-3'                    |
| <b>B) Oligonucleotides for RNA interference</b>       |                                                                   |
| <b>β2-syn shRNA</b>                                   | 5'-TCTCGTAGCTA TCCACACCAACATAATTCAAGAGATATGTTGGTGTGGATAGCTACCT-3' |
| <b>Cdk5 shRNA</b>                                     | 5'-TCTCGCGCCATCATTCGAAACAATTCAAGAGATTGTTTCGAATGATGGCGCCT-3'       |
| <b>scr shRNA</b>                                      | 5'- TCTCGTGAAATAGAGTGTAGGAATTCAAGAGATTCCTACACTCTATTTACCT-3'       |
| <b>C) Oligonucleotides for qRT-PCR</b>                |                                                                   |
| <b>β2-syn_s</b>                                       | 5'-AACGAGT TCTGGAGCGCTCTC-3'                                      |
| <b>β2-syn_as</b>                                      | 5'-CTTCAGAATGATCTGGTAGAGG-3'                                      |
| <b>Cdk5_s</b>                                         | 5'-AACGAGTTCTGGAGCGCTCTC-3'                                       |
| <b>Cdk5_as</b>                                        | 5'-CTTCAGAATGATCTGGTAGAGG-3'                                      |

β2-syn = β2-syntrophin; scr = scrambled, s = sense; as = antisense
